# Supplementary material
Source: Research Square preprint supplement (doi:10.21203/rs.3.rs-9424736/v1)
Supplement: Supplementary file 1 [file e03ccfb5240acb5cfab9da42.xlsx]

## Sheet: Sheet1
R.a. Name	Date 1	Latitude 1	Longitude 1	Date 2	Latitude 2	Longitude 2	Distance 2	Date 3	Latitude 3	Longitude 3	Distance 3	Date 4	Latitude 4	Longitude 4	Distance 4	Date 5	Latitude 5	Longitude 5	Distance 5	Date 6	Latitude 6	Longitude 6	Distance 6	Date 7	Latitude 7	Longitude 7	Distance 7	Date 8	Latitude 8	Longitude 8	Distance 8	Date 9	Latitude 9	Longitude 9	Distance 9	Date 10	Latitude 10	Longitude 10	Distance 10	Date 11	Latitude 11	Longitude 11	Distance 11	Date 12	Latitude 12	Longitude 12	Distance 12	Date 13	Latitude 13
R.a. 1♂ (2022)	2022-06-24	49.463528	21.563000
R.a. 2♂ (2022)	2022-06-29	49.463528	21.563000
R.a. 3♂ (2022)	2022-06-29	49.463528	21.563000	2022-07-05	49.463528	21.563000	0	2022-07-07	49.463528	21.563000	0	2022-07-13	49.463528	21.563000	0	2022-07-14	49.463528	21.563000	0	2022-07-15	49.463528	21.563000	0	2022-07-18	49.463528	21.563000	0	2022-07-19	49.463528	21.563000	0
R.a. 4♂ (2022)	2022-06-30	49.463528	21.563000	2022-07-05	49.463528	21.563000	0	2022-07-06	49.463528	21.563000	0	2022-07-07	49.463528	21.563000	0	2022-07-08	49.463528	21.563000	0
R.a. 5♂ (2022)	2022-06-30	49.463528	21.563000
R.a. 6♂ (2022)	2022-06-30	49.463528	21.563000
R.a. 7♂ (2022)	2022-07-01	49.463528	21.563000
R.a. 8♂ (2022)	2022-07-01	49.463528	21.563000
R.a. 9♂ (2022)	2022-07-04	49.463528	21.563000	2022-07-05	49.463528	21.563000	0	2022-07-06	49.463528	21.563000	0	2022-07-07	49.463528	21.563000	0
R.a. 10♀ (2022)	2022-07-04	49.463528	21.563000
R.a. 11♂ (2022)	2022-07-04	49.463528	21.563000	2022-07-05	49.463528	21.563000	0	2022-07-15	49.463528	21.563000	0
R.a. 12♂ (2022)	2022-07-04	49.463528	21.563000
R.a. 13♂ (2022)	2022-07-05	49.463528	21.563000	2022-07-13	49.463528	21.563000	0	2022-07-14	49.463528	21.563000	0	2022-07-15	49.463528	21.563000	0
R.a. 14♀ (2022)	2022-07-05	49.463528	21.563000
R.a. 15♂ (2022)	2022-07-05	49.463528	21.563000
R.a. 16♂ (2022)	2022-07-05	49.463528	21.563000	2022-07-06	49.463528	21.563000	0	2022-07-13	49.463528	21.563000	0
R.a. 17♂ (2022)	2022-07-05	49.463528	21.563000	2022-07-06	49.463528	21.563000	0
R.a. 18♂ (2022)	2022-07-05	49.463528	21.563000
R.a. 19♂ (2022)	2022-07-06	49.463528	21.563000
R.a. 20♂ (2022)	2022-07-07	49.463528	21.563000
R.a. 21♂ (2022)	2022-07-11	49.463528	21.563000	2022-07-12	49.463528	21.563000	0	2022-07-13	49.463528	21.563000	0
R.a. 22♂ (2022)	2022-07-13	49.463528	21.563000
R.a. 23♂ (2022)	2022-07-13	49.463528	21.563000
R.a. 24♂ (2022)	2022-07-13	49.463528	21.563000	2022-07-14	49.463528	21.563000	0
R.a. 25♂ (2022)	2022-07-13	49.463528	21.563000
R.a. 26♂ (2022)	2022-07-13	49.463528	21.563000
R.a. 27♂ (2022)	2022-07-13	49.463528	21.563000	2022-07-14	49.463528	21.563000	0
R.a. 28♂ (2022)	2022-07-13	49.463528	21.563000
R.a. 29♂ (2022)	2022-07-13	49.463528	21.563000
R.a. 30♂ (2022)	2022-07-13	49.463528	21.563000	2022-07-14	49.463528	21.563000	0	2022-07-18	49.463528	21.563000	0
R.a. 31♂ (2022)	2022-07-13	49.463528	21.563000
R.a. 32♂ (2022)	2022-07-13	49.463528	21.563000	2022-07-14	49.463528	21.563000	0
R.a. 33♂ (2022)	2022-07-13	49.463528	21.563000
R.a. 34♀ (2022)	2022-07-14	49.463528	21.563000
R.a. 35♂ (2022)	2022-07-14	49.463528	21.563000	2022-07-15	49.463528	21.563000	0
R.a. 36♂ (2022)	2022-07-14	49.463528	21.563000
R.a. 37♂ (2022)	2022-07-14	49.463528	21.563000
R.a. 38♂ (2022)	2022-07-14	49.463528	21.563000	2022-07-15	49.463528	21.563000	0
R.a. 39♀ (2022)	2022-07-14	49.463528	21.563000
R.a. 40♂ (2022)	2022-07-14	49.463528	21.563000
R.a. 41♀ (2022)	2022-07-14	49.463528	21.563000
R.a. 42♂ (2022)	2022-07-14	49.463528	21.563000
R.a. 43♀ (2022)	2022-07-14	49.463528	21.563000	2022-07-15	49.463528	21.563000	0
R.a. 44♂ (2022)	2022-07-14	49.463528	21.563000	2022-07-15	49.463528	21.563000	0	2022-07-18	49.463528	21.563000	0	2022-07-19	49.463528	21.563000	0
R.a. 45♂ (2022)	2022-07-14	49.463528	21.563000	2022-07-15	49.463528	21.563000	0
R.a. 46♂ (2022)	2022-07-15	49.463528	21.563000	2022-07-19	49.463528	21.563000	0
R.a. 47♂ (2022)	2022-07-15	49.463528	21.563000
R.a. 48♂ (2022)	2022-07-15	49.463528	21.563000	2022-07-19	49.463528	21.563000	0
R.a. 49♂ (2022)	2022-07-15	49.463528	21.563000	2022-07-18	49.463528	21.563000	0
R.a. 50♀ (2022)	2022-07-15	49.463528	21.563000
R.a. 51♂ (2022)	2022-07-18	49.463528	21.563000	2022-07-19	49.463528	21.563000	0
R.a. 52♂ (2022)	2022-07-18	49.463528	21.563000
R.a. 53♀ (2022)	2022-07-18	49.463528	21.563000	2022-07-19	49.463528	21.563000	0
R.a. 54♂ (2022)	2022-07-18	49.463528	21.563000
R.a. 55♀ (2022)	2022-07-18	49.463528	21.563000
R.a. 56♂ (2022)	2022-07-18	49.463528	21.563000
R.a. 57♂ (2022)	2022-07-18	49.463528	21.563000
R.a. 58♀ (2022)	2022-07-18	49.463528	21.563000
R.a. 59♂ (2022)	2022-07-18	49.463528	21.563000
R.a. 60♂ (2022)	2022-07-18	49.463528	21.563000	2022-07-20	49.463528	21.563000	0
R.a. 61♂ (2022)	2022-07-18	49.463528	21.563000
R.a. 62♂ (2022)	2022-07-18	49.463528	21.563000
R.a. 63♂ (2022)	2022-07-18	49.463528	21.563000
R.a. 64♂ (2022)	2022-07-18	49.463528	21.563000
R.a. 65♂ (2022)	2022-07-18	49.463528	21.563000	2022-07-19	49.463528	21.563000	0
R.a. 66♂ (2022)	2022-07-18	49.463528	21.563000
R.a. 67♀ (2022)	2022-07-18	49.463528	21.563000
R.a. 68♂ (2022)	2022-07-19	49.463528	21.563000
R.a. 69♂ (2022)	2022-07-19	49.463528	21.563000	2022-07-20	49.463528	21.563000	0
R.a. 70♂ (2022)	2022-07-19	49.463528	21.563000
R.a. 71♂ (2022)	2022-07-19	49.463528	21.563000	2022-07-20	49.463528	21.563000	0	2022-07-21	49.463528	21.563000	0	2022-07-22	49.463528	21.563000	0
R.a. 72♂ (2022)	2022-07-19	49.463528	21.563000
R.a. 73♀ (2022)	2022-07-19	49.463528	21.563000
R.a. 74♂ (2022)	2022-07-19	49.463528	21.563000
R.a. 75♀ (2022)	2022-07-19	49.463528	21.563000
R.a. 76♀ (2022)	2022-07-19	49.463528	21.563000
R.a. 77♂ (2022)	2022-07-19	49.463528	21.563000
R.a. 78♂ (2022)	2022-07-19	49.463528	21.563000
R.a. 79♂ (2022)	2022-07-19	49.463528	21.563000
R.a. 80♂ (2022)	2022-07-19	49.463528	21.563000
R.a. 81♀ (2022)	2022-07-19	49.463528	21.563000
R.a. 82♂ (2022)	2022-07-19	49.463528	21.563000	2022-07-20	49.463528	21.563000	0
R.a. 83♂ (2022)	2022-07-19	49.463528	21.563000	2022-07-20	49.463528	21.563000	0
R.a. 84♀ (2022)	2022-07-19	49.463528	21.563000
R.a. 85♀ (2022)	2022-07-20	49.463528	21.563000
R.a. 86♂ (2022)	2022-07-20	49.463528	21.563000
R.a. 87♂ (2022)	2022-07-20	49.463528	21.563000
R.a. 88♂ (2022)	2022-07-20	49.463528	21.563000	2022-07-21	49.463528	21.563000	0	2022-07-25	49.463528	21.563000	0	2022-07-26	49.463528	21.563000	0	2022-07-27	49.463528	21.563000	0	2022-07-28	49.463528	21.563000	0	2022-07-29	49.463528	21.563000	0	2022-08-01	49.463528	21.563000	0
R.a. 89♂ (2022)	2022-07-20	49.463528	21.563000
R.a. 90♂ (2022)	2022-07-20	49.463528	21.563000
R.a. 91♂ (2022)	2022-07-20	49.463528	21.563000
R.a. 92♂ (2022)	2022-07-20	49.463528	21.563000
R.a. 93♀ (2022)	2022-07-20	49.463528	21.563000
R.a. 94♂ (2022)	2022-07-20	49.463528	21.563000
R.a. 95♂ (2022)	2022-07-20	49.463528	21.563000
R.a. 96♂ (2022)	2022-07-20	49.463528	21.563000
R.a. 97♂ (2022)	2022-07-20	49.463528	21.563000
R.a. 98♂ (2022)	2022-07-20	49.463528	21.563000
R.a. 99♀ (2022)	2022-07-20	49.463528	21.563000
R.a. 100♂ (2022)	2022-07-21	49.463528	21.563000
R.a. 101♂ (2022)	2022-07-21	49.463528	21.563000	2022-07-22	49.463528	21.563000	0
R.a. 102♂ (2022)	2022-07-21	49.463528	21.563000	2022-07-22	49.463528	21.563000	0	2022-07-25	49.463528	21.563000	0	2022-07-26	49.463528	21.563000	0	2022-07-27	49.463528	21.563000	0	2022-07-28	49.463528	21.563000	0	2022-07-29	49.463528	21.563000	0
R.a. 103♂ (2022)	2022-07-21	49.463528	21.563000
R.a. 104♂ (2022)	2022-07-21	49.463528	21.563000
R.a. 105♂ (2022)	2022-07-21	49.463528	21.563000
R.a. 106♂ (2022)	2022-07-21	49.463528	21.563000
R.a. 107♂ (2022)	2022-07-21	49.463528	21.563000
R.a. 108♂ (2022)	2022-07-21	49.463528	21.563000
R.a. 109♂ (2022)	2022-07-21	49.463528	21.563000	2022-07-22	49.463528	21.563000	0
R.a. 110♂ (2022)	2022-07-21	49.463528	21.563000
R.a. 111♂ (2022)	2022-07-21	49.463528	21.563000	2022-07-22	49.463528	21.563000	0
R.a. 112♀ (2022)	2022-07-21	49.463528	21.563000
R.a. 113♀ (2022)	2022-07-21	49.463528	21.563000
R.a. 114♂ (2022)	2022-07-21	49.463528	21.563000
R.a. 115♀ (2022)	2022-07-21	49.463528	21.563000
R.a. 116♂ (2022)	2022-07-21	49.463528	21.563000
R.a. 117♀ (2022)	2022-07-21	49.463528	21.563000
R.a. 118♀ (2022)	2022-07-21	49.463528	21.563000
R.a. 119♂ (2022)	2022-07-22	49.463528	21.563000
R.a. 120♀ (2022)	2022-07-22	49.463528	21.563000
R.a. 121♂ (2022)	2022-07-22	49.463528	21.563000
R.a. 122♂ (2022)	2022-07-22	49.463528	21.563000
R.a. 123♀ (2022)	2022-07-22	49.463528	21.563000	2022-07-25	49.463528	21.563000	0	2022-07-26	49.463528	21.563000	0	2022-08-09	49.463528	21.563000	0	2022-08-11	49.463528	21.563000	0	2022-08-12	49.463528	21.563000	0	2022-08-16	49.463528	21.563000	0
R.a. 124♂ (2022)	2022-07-22	49.463528	21.563000
R.a. 125♂ (2022)	2022-07-22	49.463528	21.563000
R.a. 126♂ (2022)	2022-07-22	49.463528	21.563000
R.a. 127♂ (2022)	2022-07-22	49.463528	21.563000
R.a. 128♂ (2022)	2022-07-25	49.463528	21.563000
R.a. 129♂ (2022)	2022-07-25	49.463528	21.563000	2022-07-26	49.463528	21.563000	0	2022-07-27	49.463528	21.563000	0
R.a. 130♀ (2022)	2022-07-25	49.463528	21.563000	2022-08-02	49.463528	21.563000	0	2022-08-03	49.463528	21.563000	0	2022-08-05	49.463528	21.563000	0	2022-08-09	49.463528	21.563000	0	2022-08-11	49.463528	21.563000	0
R.a. 131♂ (2022)	2022-07-25	49.463528	21.563000	2022-07-26	49.463528	21.563000	0	2022-07-27	49.463528	21.563000	0
R.a. 132♂ (2022)	2022-07-25	49.463528	21.563000
R.a. 133♀ (2022)	2022-07-25	49.463528	21.563000
R.a. 134♂ (2022)	2022-07-25	49.463528	21.563000	2022-07-26	49.463528	21.563000	0	2022-07-27	49.463528	21.563000	0	2022-07-28	49.463528	21.563000	0
R.a. 135♀ (2022)	2022-07-26	49.463528	21.563000
R.a. 136♀ (2022)	2022-07-26	49.463528	21.563000
R.a. 137♂ (2022)	2022-07-26	49.463528	21.563000	2022-07-27	49.463528	21.563000	0
R.a. 138♂ (2022)	2022-07-26	49.463528	21.563000	2022-07-29	49.463528	21.563000	0	2022-08-02	49.463528	21.563000	0	2022-08-03	49.463528	21.563000	0	2022-08-04	49.463528	21.563000	0	2022-08-05	49.463528	21.563000	0
R.a. 139♂ (2022)	2022-07-26	49.463528	21.563000	2022-07-27	49.463528	21.563000	0	2022-07-28	49.463528	21.563000	0	2022-07-29	49.463528	21.563000	0
R.a. 140♀ (2022)	2022-07-26	49.463528	21.563000
R.a. 141♀ (2022)	2022-07-26	49.463528	21.563000
R.a. 142♂ (2022)	2022-07-26	49.463528	21.563000	2022-07-27	49.463528	21.563000	0	2022-07-28	49.463528	21.563000	0
R.a. 143♀ (2022)	2022-07-28	49.463528	21.563000
R.a. 144♀ (2022)	2022-07-28	49.463528	21.563000
R.a. 145♀ (2022)	2022-07-29	49.463528	21.563000
R.a. 146♀ (2022)	2022-07-29	49.463528	21.563000
R.a. 147♂ (2022)	2022-07-29	49.463528	21.563000
R.a. 148♂ (2022)	2022-07-29	49.463528	21.563000	2022-08-01	49.463528	21.563000	0	2022-08-02	49.463528	21.563000	0
R.a. 149♂ (2022)	2022-07-29	49.463528	21.563000	2022-08-01	49.463528	21.563000	0	2022-08-02	49.463528	21.563000	0
R.a. 150♀ (2022)	2022-07-29	49.463528	21.563000
R.a. 151♂ (2022)	2022-07-29	49.463528	21.563000
R.a. 152♂ (2022)	2022-07-29	49.463528	21.563000	2022-08-02	49.463528	21.563000	0	2022-08-03	49.463528	21.563000	0	2022-08-04	49.463528	21.563000	0	2022-08-05	49.463528	21.563000	0	2022-08-09	49.463528	21.563000	0	2022-08-10	49.463528	21.563000	0	2022-08-11	49.463528	21.563000	0	2022-08-12	49.463528	21.563000	0
R.a. 153♂ (2022)	2022-07-29	49.463528	21.563000	2022-08-01	49.463528	21.563000	0	2022-08-02	49.463528	21.563000	0
R.a. 154♂ (2022)	2022-08-02	49.463528	21.563000	2022-08-03	49.463528	21.563000	0	2022-08-04	49.463528	21.563000	0	2022-08-05	49.463528	21.563000	0	2022-08-09	49.463528	21.563000	0	2022-08-10	49.463528	21.563000	0	2022-08-11	49.463528	21.563000	0	2022-08-12	49.463528	21.563000	0
R.a. 155♂ (2022)	2022-08-03	49.463528	21.563000
R.a. 156♀ (2022)	2022-08-03	49.463528	21.563000
R.a. 157♀ (2022)	2022-08-03	49.463528	21.563000
R.a. 158♂ (2022)	2022-08-03	49.463528	21.563000	2022-08-04	49.463528	21.563000	0
R.a. 159♂ (2022)	2022-08-03	49.463528	21.563000	2022-08-04	49.463528	21.563000	0
R.a. 160♂ (2022)	2022-08-03	49.463528	21.563000	2022-08-04	49.463528	21.563000	0	2022-08-05	49.463528	21.563000	0
R.a. 161♀ (2022)	2022-08-03	49.463528	21.563000
R.a. 162♂ (2022)	2022-08-03	49.463528	21.563000	2022-08-04	49.463528	21.563000	0	2022-08-05	49.463528	21.563000	0	2022-08-09	49.463528	21.563000	0	2022-08-10	49.463528	21.563000	0	2022-08-12	49.463528	21.563000	0	2022-08-16	49.463528	21.563000	0	2022-08-17	49.463528	21.563000	0	2022-08-19	49.463528	21.563000	0	2022-08-22	49.463528	21.563000	0
R.a. 163♂ (2022)	2022-08-03	49.463528	21.563000
R.a. 164♂ (2022)	2022-08-03	49.463528	21.563000
R.a. 165♀ (2022)	2022-08-03	49.463528	21.563000
R.a. 166♀ (2022)	2022-08-03	49.463528	21.563000
R.a. 167♀ (2022)	2022-08-03	49.463528	21.563000
R.a. 168♂ (2022)	2022-08-03	49.463528	21.563000	2022-08-04	49.463528	21.563000	0
R.a. 169♂ (2022)	2022-08-04	49.463528	21.563000
R.a. 170♂ (2022)	2022-08-04	49.463528	21.563000	2022-08-05	49.463528	21.563000	0
R.a. 171♂ (2022)	2022-08-04	49.463528	21.563000	2022-08-05	49.463528	21.563000	0	2022-08-08	49.463528	21.563000	0	2022-08-09	49.463528	21.563000	0	2022-08-11	49.463528	21.563000	0	2022-08-12	49.463528	21.563000	0
R.a. 172♂ (2022)	2022-08-04	49.463528	21.563000	2022-08-05	49.463528	21.563000	0
R.a. 173♀ (2022)	2022-08-04	49.463528	21.563000
R.a. 174♀ (2022)	2022-08-05	49.463528	21.563000
R.a. 175♂ (2022)	2022-08-05	49.463528	21.563000
R.a. 176♀ (2022)	2022-08-09	49.463528	21.563000
R.a. 177♀ (2022)	2022-08-09	49.463528	21.563000
R.a. 178♀ (2022)	2022-08-10	49.463528	21.563000	2022-08-12	49.463528	21.563000	0
R.a. 179♂ (2022)	2022-08-17	49.463528	21.563000
R.a. 180♂ (2022)	2022-08-17	49.463528	21.563000
R.a. 181♂ (2022)	2022-08-17	49.463528	21.563000	2022-08-18	49.463528	21.563000	0
R.a. 182♂ (2022)	2022-08-17	49.463528	21.563000	2022-08-18	49.463528	21.563000	0	2022-08-19	49.463528	21.563000	0
R.a. 1♂ (2023)	2023-07-04	49.463528	21.563000
R.a. 2♂ (2023)	2023-07-06	49.463528	21.563000
R.a. 3♂ (2023)	2023-07-06	49.463528	21.563000
R.a. 4♂ (2023)	2023-07-07	49.463528	21.563000
R.a. 5♀ (2023)	2023-07-07	49.463528	21.563000
R.a. 6♂ (2023) *	2023-07-10	49.463528	21.563000	2023-07-12	49.463528	21.563000	0
R.a. 7♂ (2023) *	2023-07-12	49.463528	21.563000
R.a. 8♀ (2023) *	2023-07-12	49.463528	21.563000
R.a. 9♂ (2023) *	2023-07-12	49.463528	21.563000	2023-07-14	49.463056	21.563333	45
R.a. 10♂ (2023)	2023-07-15	49.463528	21.563000
R.a. 11♂ (2023)	2023-07-16	49.463528	21.563000
R.a. 12♂ (2023) *	2023-07-17	49.463528	21.563000
R.a. 13♂ (2023) *	2023-07-17	49.463528	21.563000
R.a. 14♂ (2023) *	2023-07-17	49.463528	21.563000
R.a. 15♀ (2023) *	2023-07-17	49.463528	21.563000
R.a. 16♂ (2023)	2023-07-18	49.463528	21.563000
R.a. 17♀ (2023) *	2023-07-18	49.463528	21.563000
R.a. 18♂ (2023)	2023-07-19	49.463528	21.563000
R.a. 19♀ (2023) *	2023-07-20	49.463528	21.563000
R.a. 20♂ (2023) *	2023-07-20	49.463528	21.563000	2023-07-24	49.463528	21.563000	0	2023-07-25	49.463528	21.563000	0	2023-07-29	49.463528	21.563000	0
R.a. 21♂ (2023) *	2023-07-20	49.463528	21.563000
R.a. 22♂ (2023) *	2023-07-20	49.463528	21.563000	2023-07-21	49.463528	21.563000	0
R.a. 23♂ (2023)	2023-07-21	49.463528	21.563000
R.a. 24♂ (2023)	2023-07-21	49.463528	21.563000
R.a. 25♂ (2023)	2023-07-21	49.463528	21.563000
R.a. 26♂ (2023)	2023-07-21	49.463528	21.563000
R.a. 27♂ (2023)	2023-07-21	49.463528	21.563000
R.a. 28♀ (2023)	2023-07-21	49.463528	21.563000	2023-07-22	49.463528	21.563000	0
R.a. 29♂ (2023)	2023-07-21	49.463528	21.563000
R.a. 30♂ (2023)	2023-07-21	49.463528	21.563000	2023-07-29	49.463528	21.563000	0	2023-07-30	49.463528	21.563000	0	2023-07-31	49.463528	21.563000	0	2023-08-01	49.463528	21.563000	0	2023-08-02	49.463528	21.563000	0	2023-08-03	49.463528	21.563000	0	2023-08-09	49.463528	21.563000	0	2023-08-10	49.463528	21.563000	0	2023-08-11	49.463528	21.563000	0
R.a. 31♂ (2023)	2023-07-22	49.463528	21.563000
R.a. 32♀ (2023)	2023-07-22	49.463528	21.563000
R.a. 33♂ (2023) *	2023-07-22	49.463528	21.563000	2023-08-01	49.4601	21.5659	428
R.a. 34♀ (2023)	2023-07-22	49.463528	21.563000
R.a. 35♂ (2023)	2023-07-22	49.463528	21.563000
R.a. 36♂ (2023)	2023-07-22	49.463528	21.563000	2023-07-23	49.463528	21.563000	0	2023-07-24	49.463528	21.563000	0	2023-07-30	49.463528	21.563000	0	2023-07-31	49.463528	21.563000	0	2023-08-01	49.463528	21.563000	0
R.a. 37♂ (2023)	2023-07-22	49.463528	21.563000	2023-07-23	49.463528	21.563000	0	2023-07-24	49.463528	21.563000	0	2023-07-25	49.463528	21.563000	0	2023-07-26	49.463528	21.563000	0	2023-07-27	49.463528	21.563000	0	2023-07-29	49.463528	21.563000	0	2023-07-30	49.463528	21.563000	0
R.a. 38♂ (2023)	2023-07-23	49.463528	21.563000
R.a. 39♂ (2023)	2023-07-23	49.463528	21.563000	2023-07-24	49.463528	21.563000	0
R.a. 40♂ (2023)	2023-07-23	49.463528	21.563000	2023-07-25	49.463528	21.563000	0
R.a. 41♀ (2023)	2023-07-23	49.463528	21.563000
R.a. 42♀ (2023)	2023-07-23	49.463528	21.563000
R.a. 43♀ (2023)	2023-07-23	49.463528	21.563000
R.a. 44♂ (2023)	2023-07-23	49.463528	21.563000
R.a. 45♂ (2023)	2023-07-23	49.463528	21.563000	2023-07-24	49.463528	21.563000	0
R.a. 46♂ (2023)	2023-07-23	49.463528	21.563000	2023-07-24	49.463528	21.563000	0	2023-07-25	49.463528	21.563000	0
R.a. 47♂ (2023)	2023-07-23	49.463528	21.563000
R.a. 48♂ (2023)	2023-07-23	49.463528	21.563000	2023-07-24	49.463528	21.563000	0
R.a. 49♀ (2023)	2023-07-24	49.463528	21.563000	2023-08-02	49.463528	21.563000	0
R.a. 50♂ (2023)	2023-07-24	49.463528	21.563000	2023-07-25	49.463528	21.563000	0	2023-07-28	49.463528	21.563000	0	2023-07-29	49.463528	21.563000	0	2023-07-30	49.463528	21.563000	0
R.a. 51♂ (2023)	2023-07-24	49.463528	21.563000
R.a. 52♀ (2023)	2023-07-24	49.463528	21.563000
R.a. 53♀ (2023)	2023-07-24	49.463528	21.563000	2023-08-01	49.463528	21.563000	0	2023-08-02	49.463528	21.563000	0
R.a. 54♀ (2023)	2023-07-24	49.463528	21.563000
R.a. 55♂ (2023)	2023-07-24	49.463528	21.563000
R.a. 56♂ (2023)	2023-07-24	49.463528	21.563000
R.a. 57♂ (2023)	2023-07-24	49.463528	21.563000
R.a. 58♂ (2023)	2023-07-24	49.463528	21.563000
R.a. 59♀ (2023)	2023-07-24	49.463528	21.563000
R.a. 60♀ (2023)	2023-07-25	49.463528	21.563000
R.a. 61♂ (2023)	2023-07-25	49.463528	21.563000
R.a. 62♂ (2023)	2023-07-25	49.463528	21.563000
R.a. 63♂ (2023)	2023-07-25	49.463528	21.563000	2023-07-29	49.463528	21.563000	0
R.a. 64♀ (2023)	2023-07-25	49.463528	21.563000
R.a. 65♂ (2023)	2023-07-25	49.463528	21.563000
R.a. 66♂ (2023)	2023-07-25	49.463528	21.563000	2023-07-29	49.463528	21.563000	0	2023-07-30	49.463528	21.563000	0	2023-07-31	49.463528	21.563000	0	2023-08-01	49.463528	21.563000	0	2023-08-02	49.463528	21.563000	0	2023-08-03	49.463528	21.563000	0
R.a. 67♀ (2023)	2023-07-26	49.463528	21.563000
R.a. 68♂ (2023)	2023-07-26	49.463528	21.563000	2023-07-29	49.463528	21.563000	0
R.a. 69♂ (2023)	2023-07-28	49.463528	21.563000	2023-07-29	49.463528	21.563000	0	2023-08-01	49.463528	21.563000	0	2023-08-02	49.463528	21.563000	0	2023-08-03	49.463528	21.563000	0
R.a. 70♂ (2023)	2023-07-29	49.463528	21.563000
R.a. 71♀ (2023)	2023-07-29	49.463528	21.563000
R.a. 72♂ (2023)	2023-07-29	49.463528	21.563000	2023-07-30	49.463528	21.563000	0
R.a. 73♂ (2023)	2023-07-29	49.463528	21.563000
R.a. 74♂ (2023)	2023-07-29	49.463528	21.563000	2023-07-30	49.463528	21.563000	0	2023-07-31	49.463528	21.563000	0	2023-08-01	49.463528	21.563000	0	2023-08-02	49.463528	21.563000	0	2023-08-03	49.463528	21.563000	0	2023-08-04	49.463528	21.563000	0	2023-08-07	49.463528	21.563000	0	2023-08-08	49.463528	21.563000	0	2023-08-09	49.463528	21.563000	0	2023-08-11	49.463528	21.563000	0	2023-08-12	49.463528	21.563000	0	2023-08-13	49.463528
R.a. 75♀ (2023)	2023-07-29	49.463528	21.563000
R.a. 76♂ (2023)	2023-07-29	49.463528	21.563000
R.a. 77♂ (2023)	2023-07-30	49.463528	21.563000
R.a. 78♀ (2023)	2023-07-30	49.463528	21.563000
R.a. 79♂ (2023)	2023-07-30	49.463528	21.563000
R.a. 80♀ (2023)	2023-07-30	49.463528	21.563000
R.a. 81♀ (2023)	2023-07-31	49.463528	21.563000
R.a. 82♀ (2023)	2023-07-31	49.463528	21.563000
R.a. 83♀ (2023)	2023-07-31	49.463528	21.563000
R.a. 84♀ (2023) *	2023-07-31	49.463528	21.563000
R.a. 85♀ (2023)	2023-07-31	49.463528	21.563000	2023-08-01	49.463528	21.563000	0
R.a. 86♀ (2023)	2023-07-31	49.463528	21.563000
R.a. 87♀ (2023)	2023-08-01	49.463528	21.563000	2023-08-01	49.463455	21.563289	21
R.a. 88♂ (2023)	2023-08-02	49.463528	21.563000
R.a. 89♀ (2023)	2023-08-02	49.463528	21.563000
R.a. 90♀ (2023)	2023-08-03	49.463528	21.563000
R.a. 91♀ (2023)	2023-08-04	49.463528	21.563000
R.a. 92♀ (2023)	2023-08-04	49.463528	21.563000
R.a. 93♀ (2023)	2023-08-07	49.463528	21.563000
R.a. 94♀ (2023)	2023-08-11	49.463528	21.563000	2023-08-13	49.463528	21.563000	0
R.a. 95♂ (2023)	2023-08-11	49.463528	21.563000	2023-08-12	49.463528	21.563000	0
R.a. 96♀ (2023)	2023-08-11	49.463528	21.563000
R.a. 97♀ (2023)	2023-08-11	49.463528	21.563000	2023-08-11	49.463056	21.563056	37
R.a. 98♂ (2023)	2023-08-12	49.463528	21.563000
R.a. 99♀ (2023)	2023-08-12	49.463528	21.563000
R.a. 100♀ (2023) *	2023-08-12	49.4601	21.5659	2023-08-13	49.463528	21.563000	428	2023-08-15	49.463528	21.563000	0	2023-08-16	49.463528	21.563000	0
R.a. 101♂ (2023)	2023-08-13	49.463528	21.563000	2023-08-14	49.463528	21.563000	0	2023-08-15	49.463528	21.563000	0
R.a. 102♂ (2023)	2023-08-13	49.463528	21.563000
R.a. 103♀ (2023)	2023-08-14	49.463528	21.563000
R.a. 104♀ (2023)	2023-08-14	49.463528	21.563000
R.a. 105♀ (2023)	2023-08-14	49.463528	21.563000
R.a. 106♀ (2023)	2023-08-14	49.463528	21.563000
R.a. 107♂ (2023) *	2023-08-14	49.463528	21.563000	2023-08-15	49.463528	21.563000	0	2023-08-16	49.463528	21.563000	0	2023-08-17	49.463528	21.563000	0	2023-08-18	49.463528	21.563000	0	2023-08-19	49.463528	21.563000	0	2023-08-20	49.463528	21.563000	0	2023-08-21	49.463528	21.563000	0	2023-08-22	49.463528	21.563000	0
R.a. 108♀ (2023) *	2023-08-15	49.463528	21.563000	2023-08-17	49.463528	21.563000	0
R.a. 109♀ (2023) *	2023-08-17	49.463528	21.563000
R.a. 110♀ (2023)	2023-08-20	49.463528	21.563000
R.a. 1♂ (2024)	2024-06-15	49.463528	21.563000
R.a. 2♂ (2024)	2024-06-15	49.463528	21.563000	2024-06-16	49.463528	21.563000	0
R.a. 3♂ (2024)	2024-06-15	49.463528	21.563000	2024-06-16	49.463528	21.563000	0	2024-06-17	49.463528	21.563000	0	2024-06-18	49.463528	21.563000	0
R.a. 4♀ (2024)	2024-06-15	49.463528	21.563000
R.a. 5♂ (2024)	2024-06-16	49.463528	21.563000
R.a. 6♂ (2024)	2024-06-16	49.463528	21.563000	2024-06-18	49.463528	21.563000	0
R.a. 7♂ (2024)	2024-06-16	49.463528	21.563000
R.a. 8♂ (2024)	2024-06-16	49.463528	21.563000	2024-06-17	49.463528	21.563000	0
R.a. 9♂ (2024)	2024-06-16	49.463528	21.563000	2024-06-17	49.463528	21.563000	0
R.a. 10♂ (2024)	2024-06-17	49.463528	21.563000
R.a. 11♂ (2024)	2024-06-17	49.463528	21.563000	2024-06-18	49.463528	21.563000	0
R.a. 12♂ (2024)	2024-06-17	49.463528	21.563000
R.a. 13♀ (2024)	2024-06-17	49.463528	21.563000
R.a. 14♀ (2024)	2024-06-18	49.463528	21.563000
R.a. 15♂ (2024)	2024-06-18	49.463528	21.563000	2024-06-19	49.463528	21.563000	0	2024-06-20	49.463528	21.563000	0	2024-06-24	49.463528	21.563000	0	2024-06-25	49.463528	21.563000	0
R.a. 16♀ (2024)	2024-06-18	49.463528	21.563000
R.a. 17♂ (2024)	2024-06-18	49.463528	21.563000
R.a. 18♂ (2024)	2024-06-19	49.463528	21.563000
R.a. 19♂ (2024)	2024-06-19	49.463528	21.563000
R.a. 20♂ (2024)	2024-06-20	49.463528	21.563000
R.a. 21♂ (2024)	2024-06-20	49.463528	21.563000
R.a. 22♂ (2024)	2024-06-20	49.463528	21.563000
R.a. 23♂ (2024)	2024-06-20	49.463528	21.563000
R.a. 24♂ (2024)	2024-06-20	49.463528	21.563000
R.a. 25♀ (2024)	2024-06-20	49.463528	21.563000
R.a. 26♂ (2024)	2024-06-20	49.463528	21.563000
R.a. 27♂ (2024)	2024-06-24	49.463528	21.563000	2024-06-25	49.463528	21.563000	0	2024-06-26	49.463528	21.563000	0
R.a. 28♂ (2024)	2024-06-24	49.463528	21.563000
R.a. 29♀ (2024)	2024-06-24	49.463528	21.563000
R.a. 30♂ (2024)	2024-06-24	49.463528	21.563000	2024-06-25	49.463528	21.563000	0
R.a. 31♂ (2024)	2024-06-25	49.463528	21.563000
R.a. 32♂ (2024)	2024-06-25	49.463528	21.563000
R.a. 33♂ (2024)	2024-06-25	49.463528	21.563000
R.a. 34♂ (2024)	2024-06-25	49.463528	21.563000
R.a. 35♂ (2024)	2024-06-26	49.463528	21.563000
R.a. 36♂ (2024)	2024-06-26	49.463528	21.563000	2024-06-27	49.463528	21.563000	0
R.a. 37♂ (2024)	2024-06-26	49.463528	21.563000	2024-06-27	49.463528	21.563000	0	2024-06-28	49.463528	21.563000	0
R.a. 38♂ (2024)	2024-06-26	49.463528	21.563000
R.a. 39♂ (2024)	2024-06-26	49.463528	21.563000
R.a. 40♂ (2024)	2024-06-26	49.463528	21.563000
R.a. 41♂ (2024)	2024-06-26	49.463528	21.563000	2024-06-27	49.463528	21.563000	0
R.a. 42♂ (2024)	2024-06-27	49.463528	21.563000
R.a. 43♂ (2024)	2024-06-27	49.463528	21.563000
R.a. 44♂ (2024)	2024-06-27	49.463528	21.563000	2024-06-28	49.463528	21.563000	0
R.a. 45♂ (2024)	2024-06-27	49.463528	21.563000	2024-06-28	49.463528	21.563000	0
R.a. 46♀ (2024)	2024-06-28	49.463528	21.563000
R.a. 47♀ (2024)	2024-06-28	49.463528	21.563000
R.a. 48♀ (2024)	2024-06-28	49.463528	21.563000	2024-07-01	49.463528	21.563000	0
R.a. 49♂ (2024)	2024-06-28	49.463528	21.563000
R.a. 50♀ (2024)	2024-06-28	49.463528	21.563000
R.a. 51♂ (2024)	2024-06-28	49.463528	21.563000	2024-07-01	49.463528	21.563000	0	2024-07-04	49.463528	21.563000	0
R.a. 52♂ (2024)	2024-06-28	49.463528	21.563000
R.a. 53♀ (2024)	2024-06-28	49.463528	21.563000
R.a. 54♂ (2024)	2024-06-28	49.463528	21.563000	2024-07-11	49.462275	21.561053	191
R.a. 55♂ (2024)	2024-07-01	49.463528	21.563000	2024-07-04	49.463528	21.563000	0
R.a. 56♂ (2024)	2024-07-01	49.463528	21.563000
R.a. 57♂ (2024)	2024-07-01	49.463528	21.563000
R.a. 58♂ (2024)	2024-07-01	49.463528	21.563000
R.a. 59♂ (2024)	2024-07-01	49.463528	21.563000
R.a. 60♂ (2024)	2024-07-01	49.463528	21.563000	2024-07-03	49.463528	21.563000	0
R.a. 61♀ (2024)	2024-07-01	49.463528	21.563000
R.a. 62♀ (2024)	2024-07-01	49.463528	21.563000
R.a. 63♂ (2024)	2024-07-01	49.463528	21.563000	2024-07-04	49.463528	21.563000	0	2024-07-06	49.463528	21.563000	0
R.a. 64♂ (2024)	2024-07-01	49.463528	21.563000
R.a. 65♀ (2024)	2024-07-01	49.463528	21.563000
R.a. 66♀ (2024)	2024-07-01	49.463528	21.563000
R.a. 67♂ (2024)	2024-07-02	49.463528	21.563000	2024-07-03	49.463528	21.563000	0	2024-07-05	49.463528	21.563000	0
R.a. 68♂ (2024)	2024-07-03	49.463528	21.563000
R.a. 69♀ (2024)	2024-07-03	49.463528	21.563000
R.a. 70♂ (2024)	2024-07-04	49.463528	21.563000	2024-07-06	49.463528	21.563000	0	2024-07-10	49.463528	21.563000	0	2024-07-12	49.463528	21.563000	0	2024-07-15	49.463528	21.563000	0	2024-07-16	49.463528	21.563000	0	2024-07-17	49.463528	21.563000	0	2024-07-18	49.463528	21.563000	0
R.a. 71♀ (2024)	2024-07-04	49.463528	21.563000
R.a. 72♂ (2024)	2024-07-04	49.463528	21.563000	2024-07-11	49.461913	21.559158	325
R.a. 73♂ (2024)	2024-07-04	49.463528	21.563000
R.a. 74♂ (2024)	2024-07-04	49.463528	21.563000
R.a. 75♂ (2024)	2024-07-04	49.463528	21.563000	2024-07-11	49.462238	21.561092	193
R.a. 76♀ (2024)	2024-07-04	49.463528	21.563000
R.a. 77♀ (2024)	2024-07-04	49.463528	21.563000
R.a. 78♀ (2024)	2024-07-05	49.463528	21.563000
R.a. 79♀ (2024)	2024-07-05	49.463528	21.563000
R.a. 80♂ (2024)	2024-07-06	49.463528	21.563000
R.a. 81♂ (2024)	2024-07-06	49.463528	21.563000
R.a. 82♂ (2024)	2024-07-06	49.463528	21.563000	2024-07-09	49.463528	21.563000	0
R.a. 83♀ (2024)	2024-07-06	49.463528	21.563000
R.a. 84♂ (2024)	2024-07-08	49.463528	21.563000
R.a. 85♀ (2024)	2024-07-08	49.463528	21.563000
R.a. 86♀ (2024)	2024-07-08	49.463528	21.563000
R.a. 87♂ (2024)	2024-07-08	49.463528	21.563000
R.a. 88♀ (2024)	2024-07-08	49.463528	21.563000
R.a. 89♂ (2024)	2024-07-08	49.463528	21.563000
R.a. 90♂ (2024)	2024-07-08	49.463528	21.563000
R.a. 91♂ (2024)	2024-07-08	49.463528	21.563000
R.a. 92♂ (2024)	2024-07-08	49.463528	21.563000
R.a. 93♂ (2024)	2024-07-08	49.463528	21.563000	2024-07-09	49.463528	21.563000	0
R.a. 94♂ (2024)	2024-07-09	49.463528	21.563000
R.a. 95♀ (2024)	2024-07-09	49.463528	21.563000
R.a. 96♂ (2024)	2024-07-09	49.463528	21.563000
R.a. 97♂ (2024)	2024-07-09	49.463528	21.563000
R.a. 98♂ (2024)	2024-07-09	49.463528	21.563000
R.a. 99♀ (2024)	2024-07-09	49.463528	21.563000
R.a. 100♂ (2024)	2024-07-09	49.463528	21.563000
R.a. 101♀ (2024)	2024-07-09	49.463528	21.563000
R.a. 102♂ (2024)	2024-07-09	49.463528	21.563000
R.a. 103♀ (2024)	2024-07-09	49.463528	21.563000
R.a. 104♀ (2024)	2024-07-09	49.463528	21.563000
R.a. 105♀ (2024)	2024-07-09	49.463528	21.563000
R.a. 106♀ (2024)	2024-07-09	49.463528	21.563000
R.a. 107♀ (2024)	2024-07-09	49.463528	21.563000
R.a. 108♂ (2024)	2024-07-10	49.463528	21.563000
R.a. 109♂ (2024)	2024-07-10	49.463528	21.563000
R.a. 110♂ (2024)	2024-07-12	49.463528	21.563000	2024-07-15	49.463528	21.563000	0
R.a. 111♂ (2024)	2024-07-12	49.463528	21.563000
R.a. 112♂ (2024)	2024-07-12	49.463528	21.563000
R.a. 113♀ (2024)	2024-07-12	49.463528	21.563000
R.a. 114♀ (2024)	2024-07-12	49.463528	21.563000
R.a. 115♂ (2024)	2024-07-12	49.463528	21.563000
R.a. 116♂ (2024)	2024-07-15	49.463528	21.563000
R.a. 117♂ (2024)	2024-07-11	49.463563	21.562288	2024-07-15	49.463528	21.563000	55
R.a. 118♂ (2024)	2024-07-15	49.463528	21.563000
R.a. 119♂ (2024)	2024-07-15	49.463528	21.563000
R.a. 120♂ (2024)	2024-07-16	49.463528	21.563000	2024-07-17	49.463528	21.563000	0
R.a. 121♀ (2024)	2024-07-16	49.463528	21.563000
R.a. 122♂ (2024)	2024-07-17	49.463528	21.563000
R.a. 123♂ (2024)	2024-07-29	49.463528	21.563000	2024-07-30	49.463528	21.563000	0
R.a. 124♂ (2024)	2024-07-30	49.463528	21.563000
R.a. 125♂ (2024)	2024-07-30	49.463528	21.563000
R.a. 126♂ (2024)	2024-08-01	49.463528	21.563000
R.a. 127♀ (2024)	2024-08-01	49.463528	21.563000
R.a. 128♀ (2024)	2024-08-02	49.463528	21.563000
R.a. 1♂ (2025)	2025-06-25	49.463528	21.563000
R.a. 2♂ (2025)	2025-06-26	49.463528	21.563000
R.a. 3♂ (2025)	2025-06-26	49.463528	21.563000
R.a. 4♂ (2025)	2025-06-27	49.463528	21.563000
R.a. 5♂ (2025)	2025-06-27	49.463528	21.563000
R.a. 6♂ (2025)	2025-06-27	49.463528	21.563000
R.a. 7♂ (2025)	2025-06-30	49.463528	21.563000	2025-07-01	49.463528	21.563000	0
R.a. 8♂ (2025)	2025-07-02	49.463528	21.563000
R.a. 9♂ (2025)	2025-07-02	49.463528	21.563000
R.a. 10♂ (2025)	2025-07-03	49.463528	21.563000
R.a. 11♂ (2025)	2025-07-06	49.463528	21.563000	2025-07-07	49.463528	21.563000	0
R.a. 12♂ (2025)	2025-07-06	49.463528	21.563000
R.a. 13♂ (2025)	2025-07-07	49.463528	21.563000
R.a. 14♂ (2025)	2025-07-07	49.463528	21.563000
R.a. 15♀ (2025)	2025-07-07	49.463528	21.563000
R.a. 16♂ (2025)	2025-07-07	49.463528	21.563000
R.a. 17♀ (2025)	2025-07-07	49.463528	21.563000
R.a. 18♂ (2025)	2025-07-14	49.463528	21.563000
R.a. 19♂ (2025)	2025-07-14	49.463528	21.563000
R.a. 20♂ (2025)	2025-07-14	49.463528	21.563000
R.a. 21♀ (2025)	2025-07-14	49.463528	21.563000
R.a. 22♂ (2025)	2025-07-15	49.463528	21.563000
R.a. 23♂ (2025)	2025-07-15	49.463528	21.563000
R.a. 24♂ (2025)	2025-07-15	49.463528	21.563000
R.a. 25♀ (2025)	2025-07-15	49.463528	21.563000
R.a. 26♂ (2025)	2025-07-15	49.463528	21.563000
R.a. 27♂ (2025)	2025-07-15	49.463528	21.563000
R.a. 28♀ (2025)	2025-07-15	49.463528	21.563000
R.a. 29♀ (2025)	2025-07-15	49.463528	21.563000
R.a. 30♂ (2025)	2025-07-15	49.463528	21.563000
R.a. 31♀ (2025)	2025-07-16	49.463528	21.563000
R.a. 32♂ (2025)	2025-07-16	49.463528	21.563000
R.a. 33♂ (2025)	2025-07-17	49.463528	21.563000
R.a. 34♀ (2025)	2025-07-18	49.463528	21.563000
R.a. 35♂ (2025)	2025-07-21	49.463528	21.563000
R.a. 36♂ (2025)	2025-07-21	49.463528	21.563000
R.a. 37♂ (2025)	2025-07-21	49.463528	21.563000
R.a. 38♂ (2025)	2025-07-21	49.463528	21.563000
R.a. 39♀ (2025)	2025-07-21	49.463528	21.563000	2025-07-30	49.464011	21.562747	55	2025-08-01	49.463528	21.563000	55
R.a. 40♀ (2025)	2025-07-21	49.463528	21.563000
R.a. 41♂ (2025)	2025-07-21	49.463528	21.563000
R.a. 42♂ (2025)	2025-07-22	49.463528	21.563000
R.a. 43♂ (2025)	2025-07-22	49.463528	21.563000
R.a. 44♀ (2025)	2025-07-22	49.463528	21.563000
R.a. 45♀ (2025)	2025-07-22	49.463528	21.563000
R.a. 46♂ (2025)	2025-07-22	49.463528	21.563000
R.a. 47♀ (2025)	2025-07-22	49.463528	21.563000
R.a. 48♂ (2025)	2025-07-22	49.463528	21.563000	2025-08-01	49.464011	21.562747	55
R.a. 49♀ (2025)	2025-07-22	49.463528	21.563000
R.a. 50♂ (2025)	2025-07-22	49.463528	21.563000	2025-07-23	49.463528	21.563000	0	2025-07-24	49.463528	21.563000	0	2025-07-25	49.463528	21.563000	0	2025-07-30	49.463528	21.563000	0	2025-07-31	49.463528	21.563000	0
R.a. 51♂ (2025)	2025-07-22	49.463528	21.563000
R.a. 52♀ (2025)	2025-07-22	49.463528	21.563000	2025-07-23	49.463528	21.563000	0
R.a. 53♀ (2025)	2025-07-22	49.463528	21.563000	2025-07-23	49.4638	21.5626	45
R.a. 54♂ (2025)	2025-07-22	49.463528	21.563000
R.a. 55♂ (2025)	2025-07-23	49.463528	21.563000	2025-08-01	49.464011	21.562747	55	2025-08-05	49.464011	21.562747	0	2025-08-07	49.464011	21.562747	0	2025-08-08	49.464011	21.562747	0
R.a. 56♂ (2025)	2025-07-23	49.463528	21.563000
R.a. 57♀ (2025)	2025-07-23	49.463528	21.563000	2025-07-30	49.471064	21.560564	845
R.a. 58♀ (2025)	2025-07-23	49.463528	21.563000
R.a. 59♂ (2025)	2025-07-23	49.463528	21.563000
R.a. 60♂ (2025)	2025-07-23	49.463528	21.563000
R.a. 61♀ (2025)	2025-07-23	49.463528	21.563000
R.a. 62♂ (2025)	2025-07-23	49.463528	21.563000
R.a. 63♀ (2025)	2025-07-23	49.463528	21.563000
R.a. 64♀ (2025)	2025-07-24	49.463528	21.563000
R.a. 65♂ (2025)	2025-07-24	49.463528	21.563000
R.a. 66♀ (2025)	2025-07-24	49.463528	21.563000
R.a. 67? (2025)	2025-07-24	49.463528	21.563000
R.a. 68♂ (2025)	2025-07-24	49.463528	21.563000
R.a. 69♀ (2025)	2025-07-24	49.463528	21.563000	2025-07-31	49.464011	21.562747	55
R.a. 70♂ (2025)	2025-07-24	49.463528	21.563000	2025-07-30	49.464011	21.562747	55	2025-08-01	49.464011	21.562747	0
R.a. 71♀ (2025)	2025-07-25	49.463528	21.563000
R.a. 72♀ (2025)	2025-07-25	49.463528	21.563000
R.a. 73♀ (2025)	2025-07-25	49.463528	21.563000
R.a. 74♀ (2025)	2025-07-26	49.463528	21.563000
R.a. 75♂ (2025)	2025-07-26	49.463528	21.563000
R.a. 76♂ (2025)	2025-07-26	49.463528	21.563000
R.a. 77♂ (2025)	2025-07-27	49.463528	21.563000
R.a. 78♀ (2025)	2025-07-27	49.463528	21.563000	2025-07-30	49.464011	21.562747	55
R.a. 79♀ (2025)	2025-07-27	49.463528	21.563000
R.a. 80♂ (2025)	2025-07-28	49.463528	21.563000
R.a. 81♀ (2025)	2025-07-28	49.463528	21.563000
R.a. 82♂ (2025)	2025-07-28	49.463528	21.563000
R.a. 83♂ (2025)	2025-07-28	49.463528	21.563000
R.a. 84♀ (2025)	2025-07-28	49.463528	21.563000
R.a. 85♂ (2025)	2025-07-29	49.463528	21.563000
R.a. 86♀ (2025)	2025-07-29	49.463528	21.563000
R.a. 87? (2025)	2025-07-29	49.463528	21.563000
R.a. 88♀ (2025)	2025-07-29	49.463528	21.563000
R.a. 89♂ (2025)	2025-07-30	49.463528	21.563000
R.a. 90♂ (2025)	2025-07-30	49.463528	21.563000
R.a. 91♀ (2025)	2025-07-30	49.463528	21.563000
R.a. 92♀ (2025)	2025-07-30	49.463528	21.563000
R.a. 93♀ (2025)	2025-07-30	49.463528	21.563000
R.a. 94♂ (2025)	2025-07-30	49.463528	21.563000	2025-07-31	49.463528	21.563000	0
R.a. 95♀ (2025)	2025-07-31	49.463528	21.563000
R.a. 96♀ (2025)	2025-08-01	49.463528	21.563000
R.a. 97♂ (2025)	2025-07-30	49.464011	21.562747	2025-08-01	49.464011	21.562747	0	2025-08-05	49.463528	21.563000	55
R.a. 98♀ (2025)	2025-08-08	49.464011	21.562747	2025-08-10	49.463528	21.563000	55	2025-08-12	49.463528	21.563000	0
R.a. 99♀ (2025)	2025-08-12	49.463528	21.563000
Hałbów H1♀ *	2023-07-19	49.5344	21.5267
Hałbów H2♀ *	2023-07-19	49.5344	21.5267
Hałbów H3♂ *	2023-07-19	49.5344	21.5267
Hałbów H4♂ *	2023-07-19	49.5344	21.5267
Hałbów H5♂ *	2023-07-24	49.5342	21.5267
Hałbów H6♂ *	2023-07-24	49.5342	21.5267
Hałbów H7♀ *	2023-07-24	49.5342	21.5267
Hałbów H8♂ *	2023-07-24	49.5342	21.5256
Hałbów H9♂ *	2023-07-24	49.5342	21.5256
Hałbów H10♂ *	2023-07-24	49.5344	21.5244
Hałbów H11♂ *	2023-07-24	49.5344	21.5244
Hałbów H12♂ *	2023-07-24	49.5325	21.5253
Kolanin KO1♂ *	2023-07-23	49.5411	21.4508
Kolanin KO2♂ *	2023-07-25	49.5417	21.4497
Kolanin KO3♂ *	2023-07-25	49.5417	21.45
Kolanin KO4♂ *	2023-07-25	49.5411	21.4511
Kolanin KO5♂ *	2023-07-25	49.5411	21.4511
Kolanin KO6♂ *	2023-07-25	49.5411	21.4511
Kolanin KO7♂ *	2023-07-30	49.5411	21.4503
Kolanin KO8♂ *	2023-07-30	49.5411	21.4503
Kolanin KO9♂ *	2023-07-30	49.5408	21.4511
Kolanin KO10♀ *	2023-07-30	49.5411	21.4511
Kolanin KO11♂ *	2023-07-30	49.5411	21.4511
Ciechania C1♂ *	2023-07-22	49.445528	21.485283	2023-07-25	49.445528	21.485283	0	2023-07-30	49.4452	21.485797	52	2023-07-31	49.4452	21.485797	0
Ciechania C2♀ *	2023-07-25	49.445447	21.485306
Ciechania C3♂ *	2023-07-25	49.445447	21.485306	2023-07-30	49.445447	21.485306	0	2023-07-31	49.445447	21.485306	0
Ciechania C4♂ *	2023-07-25	49.445447	21.485306
Ciechania C5♀ *	2023-07-27	49.445447	21.485306
Ciechania C6♂ *	2023-07-29	49.445447	21.485306
Ciechania C7♂ *	2023-07-30	49.445447	21.485306	2023-07-31	49.445447	21.485306	0
Ciechania C8♀ *	2023-07-31	49.4453	21.4853
Ciechania C9♂ *	2023-08-09	49.4453	21.4897
Ciechania C10♂ *	2023-08-02	49.4453	21.4897
Ciechania C11♂	2023-08-11	49.4453	21.4897	2023-08-12	49.4453	21.4897	0
Huta Polańska P1♂ *	2023-07-21	49.4483	21.5353
Huta Polańska P2♀ *	2023-07-21	49.4481	21.5356
Huta Polańska P3♂ *	2023-07-21	49.4481	21.5356
Huta Polańska P4♂ *	2023-07-23	49.4431	21.5211
Huta Polańska P5♂ *	2023-07-23	49.4431	21.5211
Huta Polańska P6♂ *	2023-07-25	49.45	21.5367
Huta Polańska P7♀ *	2023-07-25	49.45	21.5367
Huta Polańska P8♂ *	2023-07-29	49.45	21.5367
Huta Polańska P9♂ *	2023-07-29	49.45	21.5367
Huta Polańska P10♂ *	2023-07-29	49.45	21.5367
Huta Polańska P11♂ *	2023-08-11	49.45	21.5367
Huta Polańska No Markings 1	2023-07-23	49.4483	21.5353
Huta Polańska No Markings 2	2023-07-23	49.4483	21.5353
Słodkie S1♂ *	2023-07-24	49.4872	21.4736
Słodkie S2♀ *	2023-07-24	49.4878	21.4742
Słodkie S3♂ *	2023-07-24	49.4878	21.4736
Słodkie S4♂ *	2023-07-24	49.4878	21.4742
Słodkie S5♀ *	2023-07-24	49.4878	21.4747
Słodkie S6♀ *	2023-07-24	49.4878	21.4742
Słodkie S7♂ *	2023-07-31	49.4911	21.4786
Słodkie S8♂ *	2023-07-31	49.4911	21.4786
Słodkie S9♂ *	2023-07-31	49.4911	21.4786
Słodkie S10♂ *	2023-08-01	49.491122	21.478639
Słodkie S11♀ *	2023-08-01	49.491114	21.478611
Jaworze J1♂ *	2023-07-30	49.5664	21.3956
Jaworze J2♂ *	2023-07-30	49.5661	21.3958
Jaworze J3♂ *	2023-07-30	49.5758	21.3942
Jaworze J4♂ *	2023-07-30	49.5758	21.3942
Jaworze J5♀ *	2023-07-30	49.5758	21.3942
Jaworze J6♂ *	2023-07-30	49.5758	21.3942
Jaworze J7♀ *	2023-07-30	49.5692	21.3997
Jaworze J8♂ *	2023-07-30	49.5692	21.3997
Jaworze J9♂ *	2023-07-30	49.5692	21.3997
Jaworze J10♂ *	2023-07-30	49.5689	21.3997
Grab G1♂ *	2023-07-22	49.4530	21.4578
Grab G2♂ *	2023-07-22	49.4530	21.4578
Huta Krempnska HK1♂ *	2023-07-23	49.4869	21.5144
Nieznajowa Stack N1♂ *	2023-07-31	49.4994	21.3956
Nieznajowa Stack N2♂ *	2023-08-13	49.4994	21.3956
Krempna Stack K1♀ *	2023-07-19	49.5094	21.4875
Krempna Stack K2♀ *	2023-08-17	49.5094	21.4875
Baranie Elm Bw1♂ *	2023-08-01	49.4601	21.5659
Baranie Elm Bw3♂ *	2023-08-01	49.4601	21.5659
Baranie Elm Bw4♀ *	2023-08-01	49.4601	21.5659
Baranie Elm Bw5♂ *	2023-08-02	49.4601	21.5659	2023-08-04	49.4601	21.5659	0
Baranie Elm Bw6♂ *	2023-08-02	49.4601	21.5659	2023-08-04	49.4601	21.5659	0
Baranie Elm Bw7♀ *	2023-08-02	49.4601	21.5659
Baranie Elm Bw8♀ *	2023-08-03	49.4601	21.5659
Baranie Elm Bw9♂ *	2023-08-04	49.4601	21.5659
Baranie Elm Bw10♂ *	2023-08-04	49.4601	21.5659
Baranie Elm Bw12♂ *	2023-08-17	49.4601	21.5659
Baranie Elm BW11♀ no DNA	2023-08-04	49.4601	21.5659
Baranie Elm BW12♂ no DNA	2023-08-04	49.4601	21.5659
Baranie Elm BW13♂ no DNA	2023-08-04	49.4601	21.5659
Baranie Elm BW14♂ no DNA	2023-08-04	49.4601	21.5659
Baranie Elm BW15♂ no DNA	2023-08-04	49.4601	21.5659
Baranie Waldek 1_1♂	2024-07-11	49.4625	21.5619
Baranie Waldek 1_2♂	2024-07-11	49.462255	21.561232	2024-07-18	49.4623	21.561100	10.7	2024-07-30	49.4623	21.561199	7.5	2024-07-31	49.4623	21.561199	0
Baranie Waldek 1_3♀	2024-07-11	49.4622	21.5597
Baranie Waldek 1_4♂	2024-07-11	49.4622	21.5594
Baranie Waldek 1_5♂	2024-07-11	49.4625	21.5597
Baranie Waldek 1_6♂	2024-07-11	49.4625	21.5594
Baranie Waldek 1_7♂	2024-07-11	49.4625	21.5594
Baranie Waldek 1_8♂	2024-07-11	49.4625	21.5597
Baranie Waldek 1_9♂	2024-07-11	49.4631	21.5603
Baranie Waldek 1_10♂	2024-07-11	49.4628	21.5606
Baranie Waldek 1_11♂	2024-07-11	49.4628	21.5603
Baranie Waldek 1_12♀	2024-07-11	49.4622	21.5611
Baranie Waldek 1_14♂	2024-07-11	49.4622	21.5611
Baranie Waldek 1_15♀	2024-07-11	49.4622	21.5611
Baranie Waldek 2_1♂	2024-07-11	49.4639	21.5611
Baranie Waldek 2_2♂	2024-07-11	49.4642	21.5606
Baranie Waldek 2_3♂	2024-07-11	49.4642	21.5606
Baranie Waldek 2_4♂	2024-07-11	49.4642	21.5606
Baranie Waldek 2_5♂	2024-07-11	49.4647	21.5603
Baranie Waldek 2_6♀	2024-07-11	49.465	21.5600
Baranie Waldek 2_7♂	2024-07-11	49.4647	21.5600
Baranie Waldek 2_8♂	2024-07-11	49.465	21.5603
Baranie Waldek 2_9♂	2024-07-11	49.465	21.5603
Baranie Waldek 2_10♂	2024-07-11	49.4658	21.5603
Baranie Waldek 2_11♂	2024-07-11	49.4658	21.5600
Baranie Waldek 2_12♂	2024-07-11	49.4658	21.5600
Baranie Waldek 2_13♂	2024-07-11	49.4658	21.5600
Baranie Waldek 2_14♂	2024-07-11	49.4661	21.5600
Baranie Waldek 2_15♂	2024-07-11	49.4661	21.5600
Baranie Waldek 2_16♂	2024-07-11	49.4664	21.5603
Baranie Waldek 2_17♂	2024-07-11	49.4661	21.5600
Baranie Waldek 2_18♂	2024-07-11	49.4664	21.5603
Baranie Waldek 2_19♀	2024-07-11	49.4664	21.5606
Baranie Waldek 2_20♂	2024-07-11	49.4661	21.5611
Baranie Waldek 2_21♀	2024-07-11	49.4664	21.5608
Baranie Waldek 2_22♂	2024-07-11	49.4661	21.5611
Baranie Waldek 2_23♂	2024-07-11	49.4656	21.5608
Baranie Waldek 2_24♂	2024-07-11	49.4653	21.5608
Baranie Waldek 2_25♂	2024-07-11	49.4647	21.5619
Baranie Waldek 2_26♂	2024-07-11	49.4641	21.5622
Baranie Waldek 2_28♂	2024-07-11	49.4636	21.5622
Baranie Waldek 2_29♂	2024-07-11	49.4636	21.5625
Baranie Damian Green 1♂	2024-07-16	49.4572	21.5669
Baranie Damian Green 2♂	2024-07-16	49.4572	21.5669
Baranie Damian Green 3♀	2024-07-16	49.4583	21.5661
Baranie Damian Green 4♂	2024-07-16	49.4583	21.5661
Baranie Damian Green 5♂	2024-07-16	49.4583	21.5661
Baranie Damian Green 6?	2024-07-16	49.4586	21.5664
Baranie Damian Green 7?	2024-07-16	49.4586	21.5664
R. a. Baranie Barrier 1♂	2024-07-04	49.469661	21.561222
R. a. Baranie Beech on the River 1♂	2024-07-12	49.457383	21.5692
R. a. Baranie Border 1♂	2024-07-12	49.4350	21.5881
R. a. Baranie Border 2♂	2024-07-12	49.4363	21.5856
R. a. Baranie Border 3♂	2024-07-17	49.4363	21.5856
R. a. Baranie Border 4♂	2024-07-31	49.4363	21.5856
R. a. Stack Before Baranie 1♂	2024-07-15	49.471064	21.560564
R. a. Stack Before Baranie 2♂	2024-07-15	49.471064	21.560564
R. a. Stack Before Baranie 3♂	2024-07-15	49.471064	21.560564	2024-07-16	49.471064	21.560564	0	2024-07-17	49.471064	21.560564	0
R. a. Stack Before Baranie 4♀	2024-07-16	49.471064	21.560564
Baranie Slope 1♀	2024-07-16	49.4625	21.5619
Baranie Slope 2♂	2024-07-16	49.4624	21.5611
Baranie Slope 3♂	2024-07-16	49.4622	21.5610
Baranie Slope 4♀	2024-07-16	49.4622	21.5610
Baranie Slope 5♀	2024-07-16	49.4617	21.5559
Baranie Slope 6♀	2024-07-16	49.4651	21.5525
Baranie Slope 7♂	2024-07-16	49.4665	21.5505
Baranie Slope 8♂	2024-07-16	49.4666	21.5503
Baranie Slope 9♀	2024-07-16	49.4686	21.5593
Baranie Slope 10♂	2024-07-18	49.4622	21.5611
Baranie Slope 11♂	2024-07-18	49.4622	21.5611
Baranie Slope 12♂	2024-07-18	49.4646	21.5617
Baranie Slope 13♂	2024-07-18	49.4646	21.5618
Baranie Slope 14♂	2024-07-18	49.4646	21.5618
Baranie Slope 15♂	2024-07-30	49.4623	21.5609
Baranie Slope 16♀	2024-07-30	49.4622	21.5610
Baranie Slope 17♂	2024-07-31	49.4622	21.561399	2024-08-01	49.4622	21.561199	15	2024-08-02	49.4623	21.561199	12	2024-08-07	49.4623	21.561399	14.5	2024-08-08	49.4623	21.561399	0
Baranie Slope 18♂	2024-08-01	49.4624	21.5612
Baranie Slope 19♀	2024-08-01	49.4621	21.561199	2024-08-02	49.4623	21.561299	23
Baranie Slope 20♀	2024-08-07	49.4623	21.561399	2024-08-08	49.4623	21.561399	0	2024-08-12	49.4623	21.561399	0	2024-08-13	49.4623	21.561099	22
Baranie Last Clearing 1♂	2025-07-23	49.4350	21.5881
Baranie Last Clearing 2♂	2025-07-24	49.4350	21.5881
Baranie Last Clearing 3♀	2025-07-24	49.4350	21.5881
Baranie Elm 1♂	2025-07-16	49.4601	21.5659
Baranie Elm 2♂	2025-07-21	49.4601	21.5659	2025-07-23	49.4601	21.5659	0
Beech before a stack on Baranie II 5♂	2025-07-30	49.464011	21.562747	2025-07-31	49.464011	21.562747	0
Beech before a stack on Baranie II 6♂	2025-07-30	49.464011	21.562747	2025-08-01	49.464011	21.562747	0
Beech before a stack on Baranie II 7♀	2025-07-30	49.464011	21.562747
Beech before a stack on Baranie II 8♂	2025-07-30	49.464011	21.562747	2025-07-31	49.464011	21.562747	0
Beech before a stack on Baranie II 9♂	2025-07-30	49.464011	21.562747
Beech before a stack on Baranie II 10♂	2025-07-30	49.464011	21.562747	2025-07-31	49.464011	21.562747	0	2025-08-05	49.464011	21.562747	0
Beech before a stack on Baranie II 11♂	2025-07-31	49.464011	21.562747	2025-08-08	49.464011	21.562747	0	2025-08-11	49.464011	21.562747	0
Beech before a stack on Baranie II 12♂	2025-07-31	49.464011	21.562747	2025-08-05	49.464011	21.562747	0
Beech before a stack on Baranie II 13♂	2025-07-31	49.464011	21.562747
Beech before a stack on Baranie II 15♀	2025-07-31	49.464011	21.562747
Beech before a stack on Baranie II 16♂	2025-07-31	49.464011	21.562747	2025-08-01	49.464011	21.562747	0
Beech before a stack on Baranie II 17♂	2025-07-31	49.464011	21.562747	2025-08-01	49.464011	21.562747	0	2025-08-05	49.464011	21.562747	0
Beech before a stack on Baranie II 18♀	2025-07-31	49.464011	21.562747
Beech before a stack on Baranie II 20♂	2025-08-01	49.464011	21.562747
Beech before a stack on Baranie II 21♂	2025-08-01	49.464011	21.562747
Beech before a stack on Baranie II 22♂	2025-08-01	49.464011	21.562747	2025-08-05	49.464011	21.562747	0	2025-08-08	49.464011	21.562747	0
Beech before a stack on Baranie II 23♂	2025-08-01	49.464011	21.562747
Beech before a stack on Baranie II 25♀	2025-08-05	49.464011	21.562747
Beech before a stack on Baranie II 26♂	2025-08-05	49.464011	21.562747	2025-08-07	49.464011	21.562747	0	2025-08-08	49.464011	21.562747	0	2025-08-13	49.464011	21.562747	0
Beech before a stack on Baranie II 27♂	2025-08-05	49.464011	21.562747	2025-08-07	49.464011	21.562747	0
Beech before a stack on Baranie II 28♂	2025-08-05	49.464011	21.562747
Beech before a stack on Baranie II 29♀	2025-08-05	49.464011	21.562747
Beech before a stack on Baranie II 30♀	2025-08-05	49.464011	21.562747
Beech before a stack on Baranie II 32♀	2025-08-05	49.464011	21.562747
Beech before a stack on Baranie II 33♀	2025-08-05	49.464011	21.562747
Beech before a stack on Baranie II 34♀	2025-08-06	49.464011	21.562747	2025-08-07	49.464011	21.562747	0	2025-08-08	49.464011	21.562747	0
Beech before a stack on Baranie II 35♂	2025-08-06	49.464011	21.562747
Beech before a stack on Baranie II 36♂	2025-08-06	49.464011	21.562747	2025-08-07	49.464011	21.562747	0
Beech before a stack on Baranie II 37♂	2025-08-07	49.464011	21.562747
Beech before a stack on Baranie II 38♀	2025-08-07	49.464011	21.562747
Beech before a stack on Baranie II 39♂	2025-08-08	49.464011	21.562747	2025-08-12	49.464011	21.562747	0	2025-08-13	49.464011	21.562747	0
Beech before a stack on Baranie II 40♀	2025-08-08	49.464011	21.562747
Beech before a stack on Baranie II 41♀	2025-08-08	49.464011	21.562747
Beech before a stack on Baranie II 42♂	2025-08-08	49.464011	21.562747
Beech before a stack on Baranie II 43♀	2025-08-08	49.464011	21.562747
Beech before a stack on Baranie II 44♂	2025-08-08	49.464011	21.562747	2025-08-12	49.464011	21.562747	0	2025-08-13	49.464011	21.562747	0
Beech before a stack on Baranie II 45♀	2025-08-08	49.464011	21.562747
Beech before a stack on Baranie II 47♂	2025-08-08	49.464011	21.562747
Beech before a stack on Baranie II 48♂	2025-08-11	49.464011	21.562747	2025-08-12	49.464011	21.562747	0
Beech before a stack on Baranie II 49♂	2025-08-11	49.464011	21.562747	2025-08-12	49.464011	21.562747	0
Beech before a stack on Baranie II 50♀	2025-08-12	49.464011	21.562747
Beech before a stack on Baranie II 51♀	2025-08-12	49.464011	21.562747
Forest behind the Ranger Station 1♂	2025-07-23	49.4623	21.5611
Forest behind the Ranger Station 2♂	2025-08-01	49.464986	21.56105	2025-08-05	49.464011	21.562747	164	2025-08-08	49.464011	21.562747	0
Stack Before Baranie 1♂	2025-07-22	49.471064	21.560564	2025-07-30	49.471064	21.560564	0	2025-08-01	49.471064	21.560564	0
Stack Before Baranie 2♂	2025-07-22	49.471064	21.560564
Stack Before Baranie 3♀	2025-07-23	49.471064	21.560564
Stack Before Baranie 4♂	2025-07-30	49.471064	21.560564	2025-07-31	49.471064	21.560564	0	2025-08-01	49.471064	21.560564	0	2025-08-05	49.471064	21.560564	0
Stack Before Baranie 6♂	2025-08-01	49.471064	21.560564
Stack Before Baranie 7♀	2025-08-01	49.471064	21.560564	2025-08-05	49.471064	21.560564	0
Stack Before Baranie 8♀	2025-08-01	49.471064	21.560564
Stack Before Baranie 9♀	2025-08-01	49.471064	21.560564
Stack Before Baranie 10♀	2025-08-01	49.471064	21.560564
Stack Before Baranie 11♂	2025-08-04	49.471064	21.560564
Stack Before Baranie 12♀	2025-08-04	49.471064	21.560564
Stack Before Baranie 13♀	2025-08-05	49.471064	21.560564
Stack Before Baranie 14♂	2025-08-05	49.471064	21.560564
Stack Before Baranie 15♀	2025-08-05	49.471064	21.560564
Stack Before Baranie 16♀	2025-08-08	49.471064	21.560564
Paper:
Title: Individual dispersal and population genetics of the alpine longhorn beetle Rosalia alpina inhabiting Magura National Park, Poland
Journal: Journal of Insects Conservation
Authors: Józef J. Różański1, Damian Nowak1, Konrad Krasoń1, Jarosław Sochacki1, Agnieszka Gancarz1, Waldemar Wojtas1, Magdalena Witek2, Anna Sztencel-Jabłonka3
1Magura National Park, 38-232 Krempna 59, Poland
2Group of Social and Myrmecophlious Insects, Museum and Institute of Zoology, Polish Academy of Science, Twarda 51/55, 00-818 Warsaw, Poland
3Department of Molecular and Biometric Techniques, Museum and Institute of Zoology, Polish Academy of Science, Twarda 51/55, 00-818 Warsaw, Poland
Corresponding Author: Józef J. Różański, e-mail: jrozanski@magurskipn.pl
[truncated: 3 more columns]
